# Supplementary material
Source: Springer Nature journal article supplement (https://www.springermedizin.de/resource/supplementary/12874_2010_515_MOESM3_ESM.pdf/9432412)

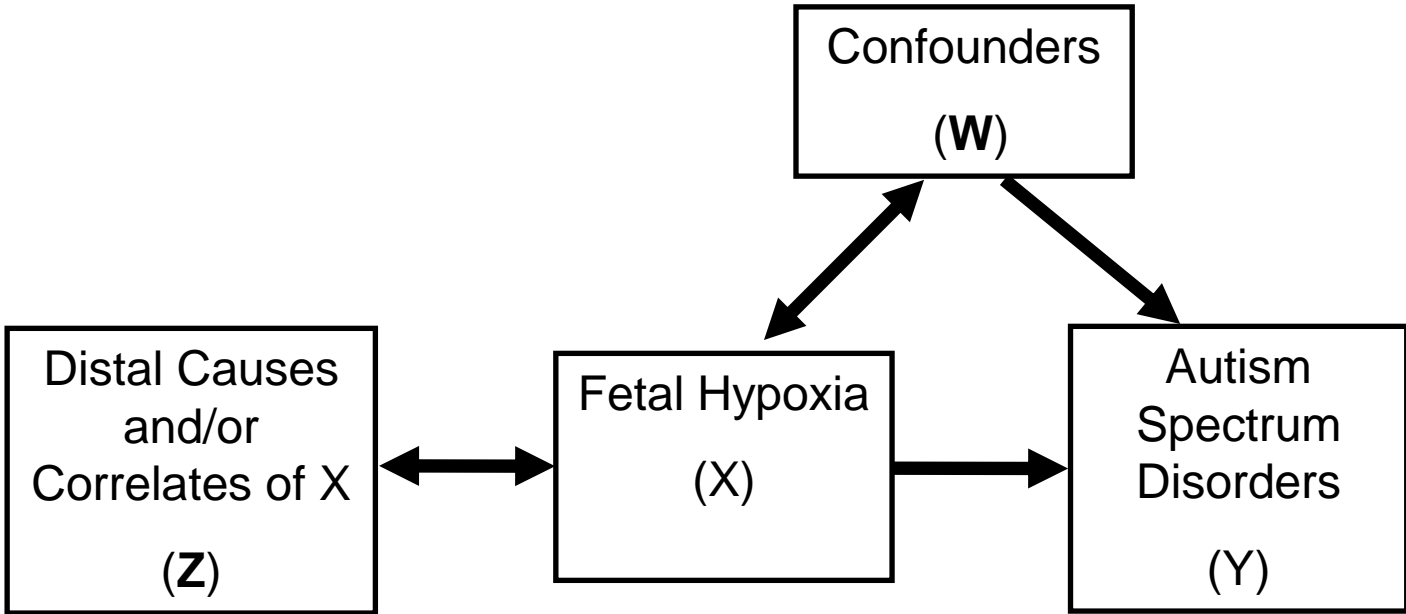

Supplement: MOESM3 [file 9432412]
